# Supplementary material for: Clinical significance of high c-MYC and low MYCBP2 expression and their association with Ikaros dysfunction in adult acute lymphoblastic leukemia
Source: PubMed Central journal article supplement (PMC4747226; doi:10.18632/oncotarget.5982), 2015-10-17
Supplement: oncotarget-06-42300-s001.pdf [file oncotarget-06-42300-s001.pdf]

## SUPPLEMENTARY FIGURES AND TABLES

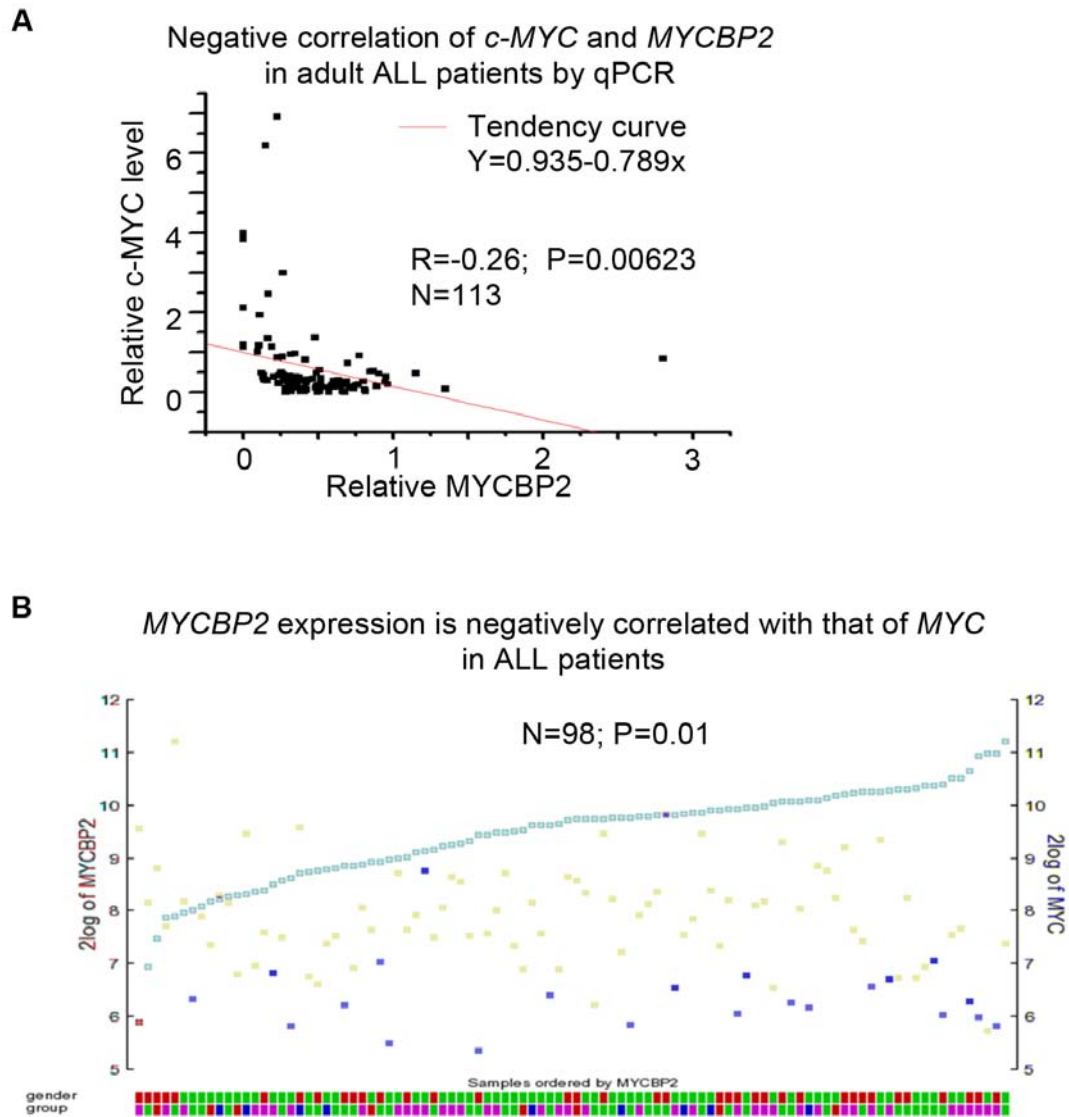

**Supplementary Figure S1: Correlation of *MYC* expression with *MYCBP2* expression in the cohort of ALL patients.** **A.** Correlation of *MYC* and *MYCBP2* expression identified by qPCR in the adult ALL cohort. **B.** Data generated from human oncogenomics server with GEO database (GSE11877 and GSM267399). Pearson correlation is used to calculate the statistics. The  $P < 0.05$  was considered statistically significant.

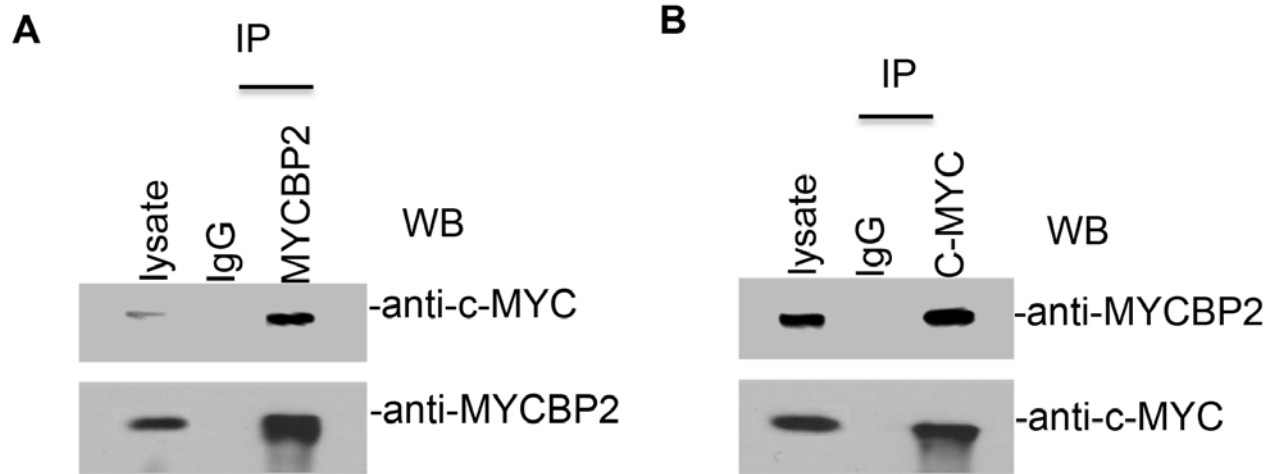

**Supplementary Figure S2: *c-MYC* interacts with *MYCBP2* in Nalm6 cells.** **A.** Co-immunoprecipitation of c-MYC by MYCBP2 in the cells; **B.** Co-immunoprecipitation of MYCBP2 by c-MYC in the cells. Total cell lysate was prepared in the cells with the lysis buffer as reported [15, 16, 36] and the co-immunoprecipitation was done as previous reported with anti-MYCBP2 or anti-c-MYC antibody, and with normal IgG as control. Co-immunoprecipitated c-MYC or MYCBP2 was detected by western blot.

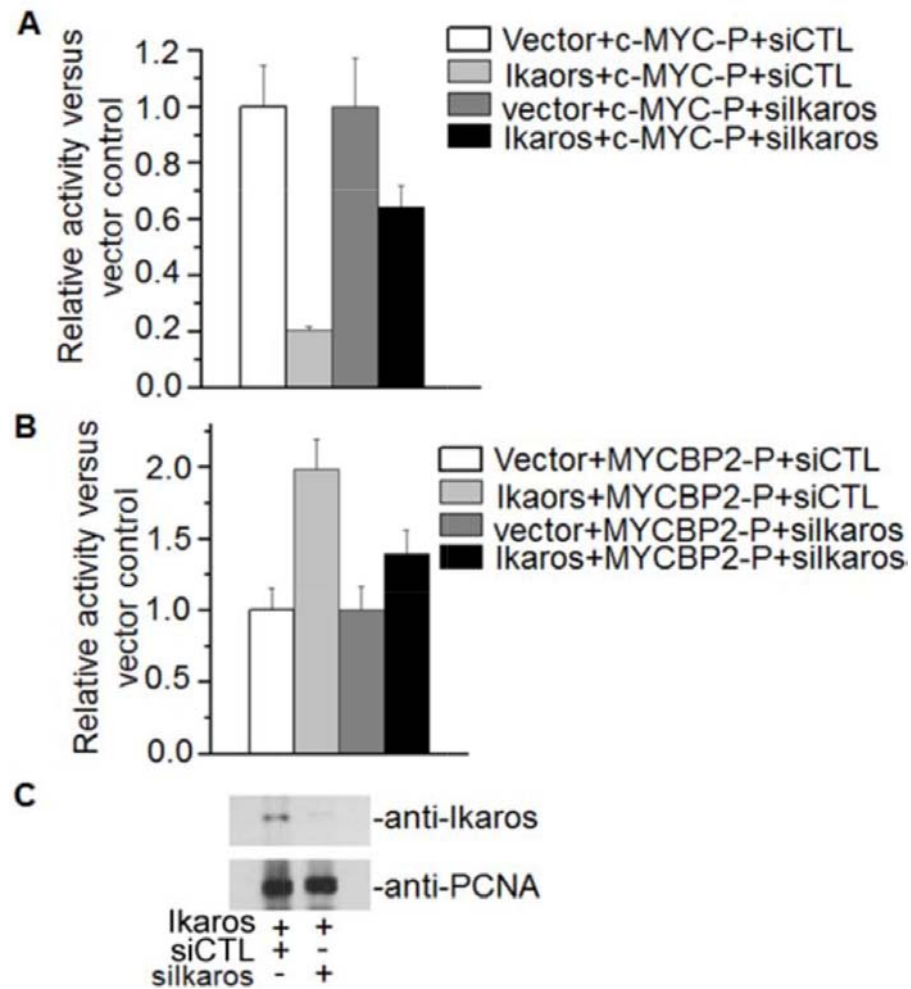

**Supplementary Figure S3: Effect of *Ikaros* knockdown on *Ikaros* regulation of promoter activity.** **A.** *Ikaros* knockdown block *Ikaros*-induced suppression of c-MYC promoter activity; *Ikaros* was transfected into the HEK293 cells with *Ikaros* shRNA (si*ikaros*) or scramble shRNA (siCTL) as control. The luciferase reporter assay was done as described in the method part; **B.** *Ikaros* knockdown blocked the *Ikaros*-induced increase of MYCBP2 promoter activity; **C.** detection of *Ikaros* protein level in the *Ikaros* knockdown cells by Western blot as previous reported (15, 36).

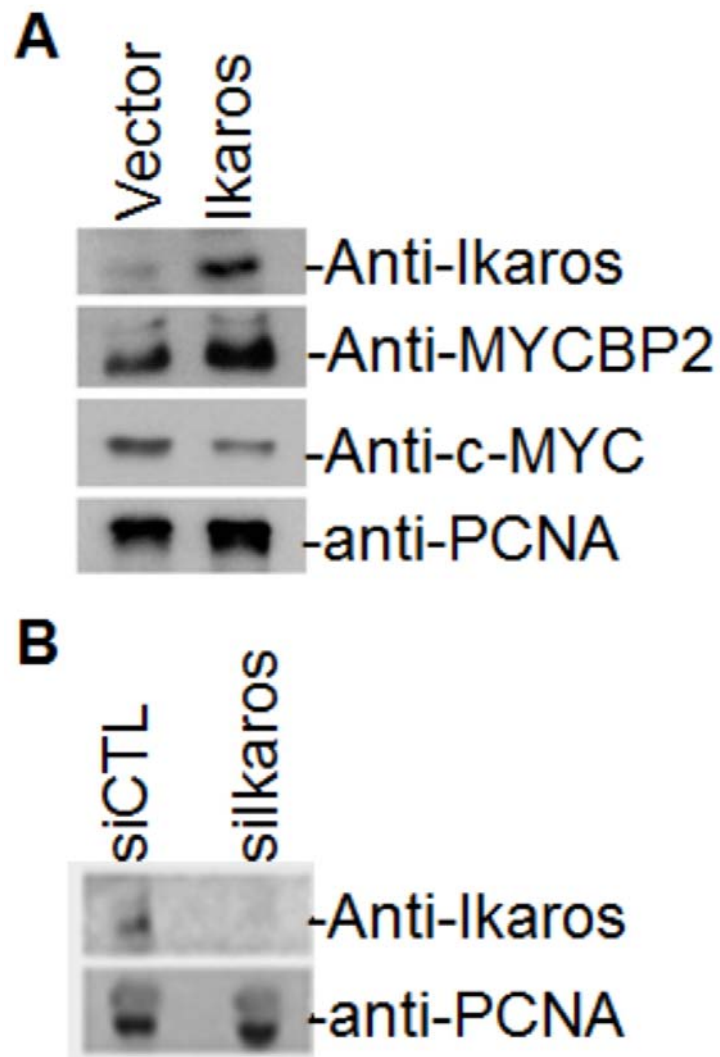

**Supplementary Figure S4: Expression of *Ikaros* results in the expression change of *c-MYC* and *MYCBP2* in Nalm6 cells and *Ikaros* level in the knockdown cells.** **A.** Expression of *Ikaros* results in the expression change of *c-MYC* and *MYCBP2* in Nalm6 cells. Nuclear extracts from retroviral *Ikaros* transduced Nalm6 cells or vector only control is prepared as previous reported [36, 16]. The expression of the indicated genes is detected in the cells by western blot with indicated antibodies. **B.** *Ikaros* protein level was also detected by western blot in Nalm6 cells expressed with *Ikaros* shRNA (*silkaros*) compared to that of scramble shRNA (*siCTL*).

- A** *Ikaros* expression is significantly positively correlated with that of *MYCBP2* in B-ALL patients

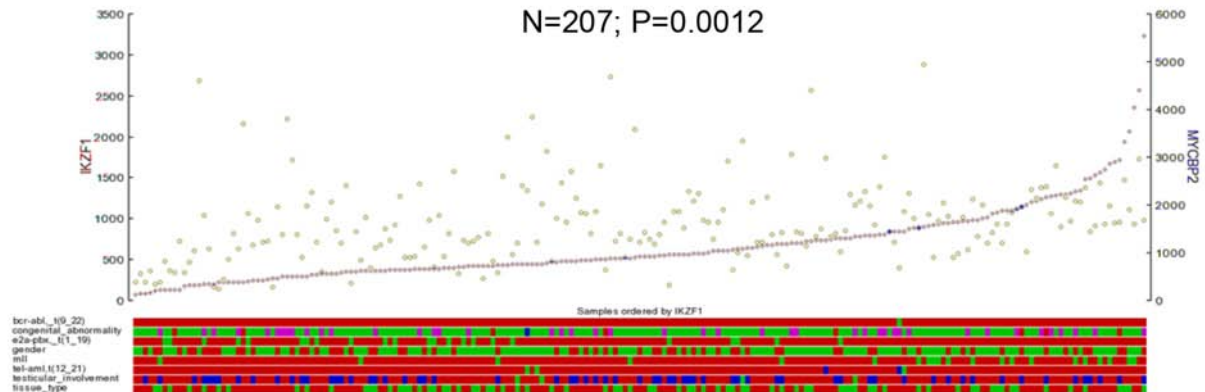

- B** *Ikaros* expression is significantly negatively correlated with that of *MYC* in B-ALL patients

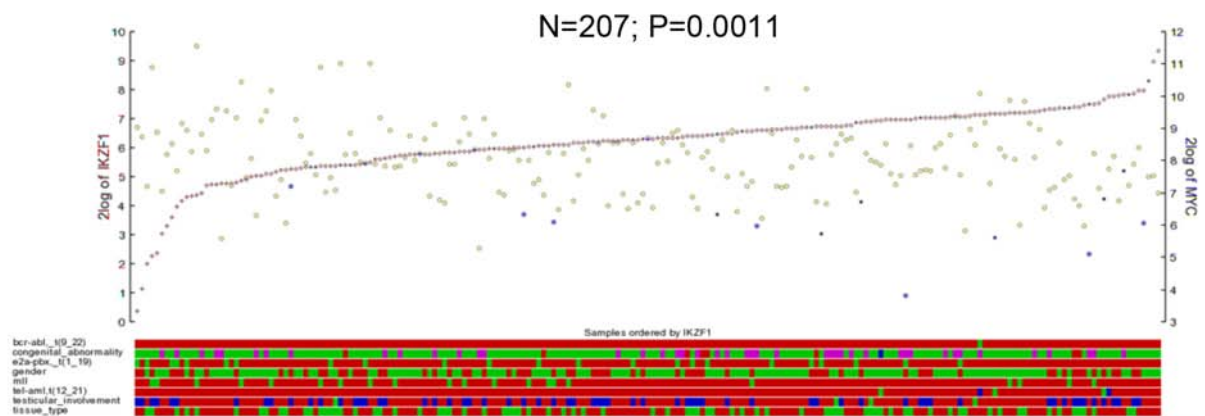

**Supplementary Figure S5: Correlation of *MYC* and *MYCBP2* expression with *Ikaros* in the cohort of B-ALL patients.** Data generated from human oncogenomics server with GEO database (GSE11877). Pearson correlation is used to calculate the statistics. The  $P < 0.05$  was considered statistically significant.

**A** *Ikaros* expression is significantly positively correlated with that of *MYCBP2* in T-ALL patients

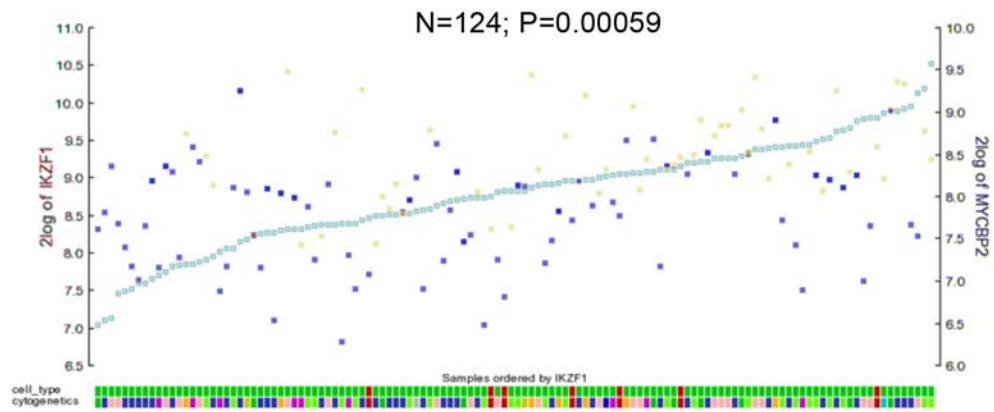

**B** *Ikaros* expression is significantly negatively correlated with that of *MYC* in T-ALL patients

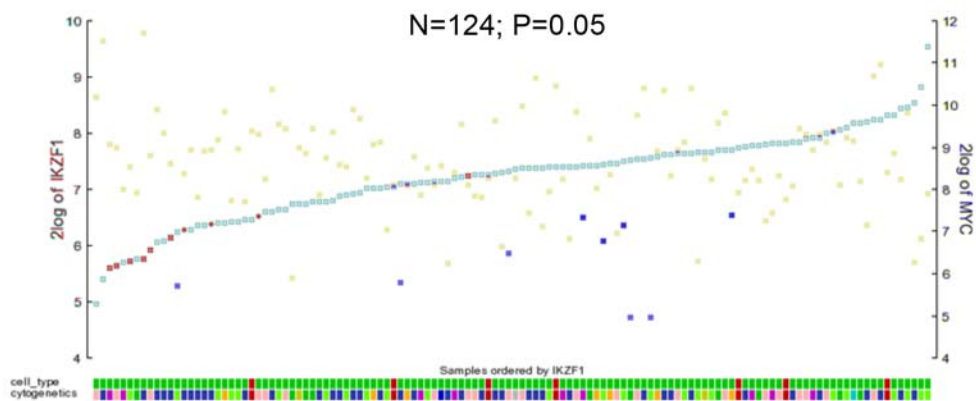

**Supplementary Figure S6: Correlation of *MYC* and *MYCBP2* expression with *Ikaros* in the cohort of T-ALL patients.** Data generated from human oncogenomics server with GEO database (GSM267399). Pearson correlation is used to calculate the statistics. The  $P < 0.05$  was considered statistically significant.

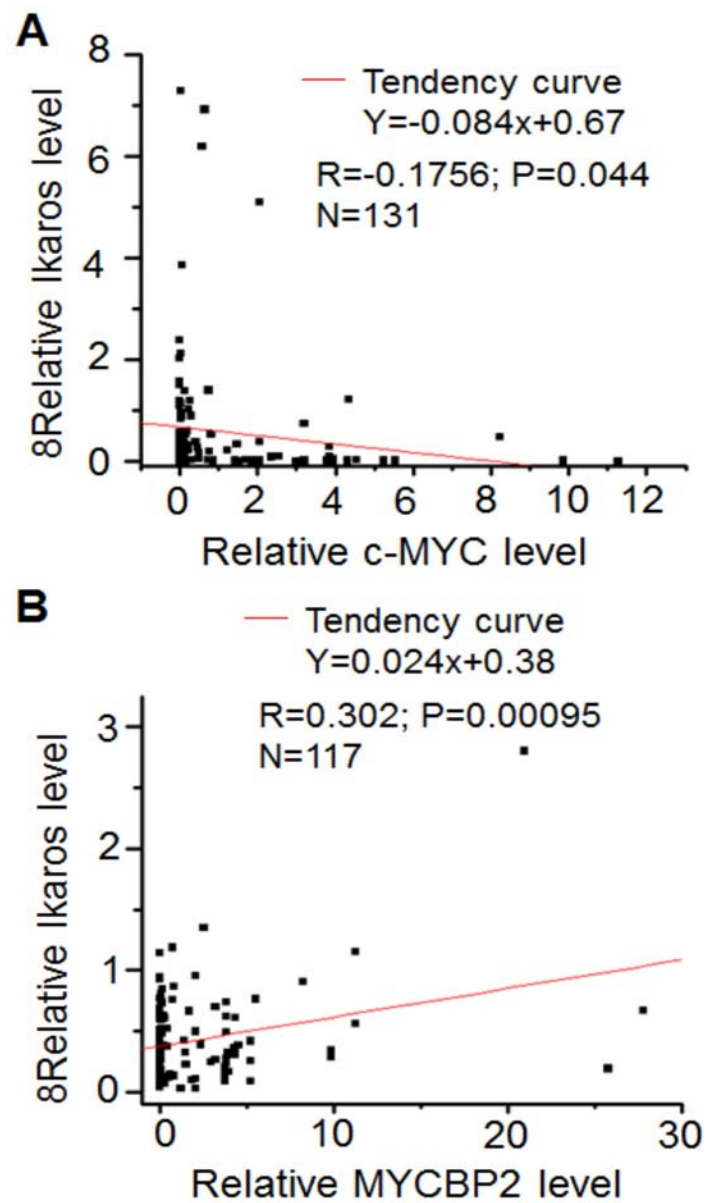

**Supplementary Figure S7: Correlation of *Ikaros* mRNA level with that of *MYC* or *MYCBP2* in the ALL patients. A–B.** The mRNA level of *Ikaros*, *c-MYC*, *MYCBP2* was detected by qPCR in ALL patients. Regression analysis of *Ikaros* level versus *c-MYC* level (A) and *MYCBP2* level (B).

**Supplementary Table S1: The correlation of expression of *c-MYC* with clinical features in acute lymphoblastic leukemia**

| Characteristics           | <i>c-MYC</i> high expression (N = 66) | <i>c-MYC</i> low expression (N = 85) | P value |
|---------------------------|---------------------------------------|--------------------------------------|---------|
| Age (years)               |                                       |                                      |         |
| Median (range)            | 36.5 (14–77)                          | 27 (14–75)                           | 0.315   |
| Sex (%)                   |                                       |                                      |         |
| male                      | 62.1                                  | 57.6                                 | 0.578   |
| WBC, × 10 <sup>9</sup> /L |                                       |                                      |         |
| median (range)            | 64.9 (0.9–487.9)                      | 30.9 (2.0–626.0)                     | 0.009   |
| HGB,g/L                   |                                       |                                      |         |
| median (range)            | 95.5 (46.0–167.0)                     | 99.0 (34.0–171.0)                    | 0.389   |
| PLT, × 10 <sup>9</sup> /L |                                       |                                      |         |
| median (range)            | 38.0 (2.0–292.0)                      | 46.0 (2.0–354.0)                     | 0.035   |
| LDH (u/L)                 |                                       |                                      |         |
| median (range)            | 1022.5 (181.0–8079.0)                 | 339.5 (104.0–973.0)                  |         |
| >1000 (%)                 | 49.2                                  | 31.2                                 | 0.033   |
| Blasts (%) median (range) |                                       |                                      |         |
| bone marrow               | 90.4 (52.0–99.6)                      | 84.4 (27.6–99.5)                     | 0.006   |
| peripheral blood          | 71.0 (0–99.0)                         | 68.0 (0–97.0)                        | 0.621   |
| B or T lineage (%)        |                                       |                                      | 0.847   |
| B-ALL                     | 69.7                                  | 68.2                                 |         |
| T-ALL                     | 30.3                                  | 31.8                                 |         |
| Immune phenotype, %       |                                       |                                      |         |
| CD34+                     | 70.8                                  | 67.1                                 | 0.635   |
| HLA-DR+                   | 80.0                                  | 75.0                                 | 0.506   |
| CD10+                     | 71.9                                  | 75.0                                 | 0.691   |
| CD19+                     | 68.3                                  | 69.3                                 | 0.901   |
| CD20+                     | 39.3                                  | 40.0                                 | 0.935   |
| CD22+                     | 49.1                                  | 56.2                                 | 0.425   |
| CD13+                     | 39.1                                  | 44.0                                 | 0.556   |
| CD33+                     | 58.7                                  | 35.4                                 | 0.006   |
| CD2+                      | 25.9                                  | 25.4                                 | 0.945   |
| CD3+                      | 15.8                                  | 20.0                                 | 0.540   |
| CD5+                      | 27.5                                  | 32.8                                 | 0.529   |
| CD7+                      | 32.7                                  | 32.9                                 | 0.988   |

(Continued)



| Characteristics                 | <i>c-MYC</i> high expression (N = 66) | <i>c-MYC</i> low expression (N = 85) | P value |
|---------------------------------|---------------------------------------|--------------------------------------|---------|
| Extramedullary infiltration (%) |                                       |                                      |         |
| liver                           | 34.8                                  | 15.5                                 | 0.006   |
| spleen                          | 53.0                                  | 36.1                                 | 0.039   |
| lymph node                      | 54.5                                  | 48.2                                 | 0.441   |
| Genetics (%)                    |                                       |                                      |         |
| Complex karyotype               | 9.8                                   | 13.6                                 | 0.543   |
| Complete remission rate (%)     | 82.3                                  | 95.8                                 | 0.010   |

**Supplementary Table S2: The correlation of expression of *MYCBP2* with clinical features in acute lymphoblastic leukemia**

| Characteristics           | <i>MYCBP2</i> high expression (N = 65) | <i>MYCBP2</i> low expression (N = 66) | P value |
|---------------------------|----------------------------------------|---------------------------------------|---------|
| Age (years)               |                                        |                                       |         |
| median (range)            | 32 (14–75)                             | 32.5 (14–77)                          | 0.657   |
| Sex (%)                   |                                        |                                       |         |
| male                      | 64.6                                   | 60.6                                  | 0.635   |
| WBC, × 10 <sup>9</sup> /L |                                        |                                       |         |
| median (range)            | 30.2 (0.9–183.9)                       | 46.5 (2.0–626.0)                      | 0.025   |
| HGB, g/L                  |                                        |                                       |         |
| median (range)            | 101.5(42.0–171.0)                      | 97.0 (34.0–151.0)                     | 0.782   |
| PLT, × 10 <sup>9</sup> /L |                                        |                                       |         |
| median (range)            | 41.5 (2.0–292.0)                       | 42.0 (5.0–354.0)                      | 0.779   |
| LDH (u/L)                 |                                        |                                       |         |
| median (range)            | 746.5 (124.0–8601.0)                   | 1038.0 (131.0–8702.0)                 |         |
| >1000 (%)                 | 34.5                                   | 50.8                                  | 0.074   |
| Blasts (%) median (range) |                                        |                                       |         |
| bone marrow               | 87.2 (27.6–98.8)                       | 88.8 (36.4–99.5)                      | 0.042   |
| peripheral blood          | 70.0 (0–97.0)                          | 64.0 (0–99.0)                         | 0.805   |
| B or T lineage (%)        |                                        |                                       | 0.077   |
| B-ALL                     | 72.3                                   | 57.6                                  |         |
| T-ALL                     | 27.7                                   | 42.4                                  |         |
| Immune phenotype, %       |                                        |                                       |         |
| CD34+                     | 64.1                                   | 73.8                                  | 0.242   |
| HLA-DR+                   | 72.4                                   | 76.0                                  | 0.672   |
| CD10+                     | 74.1                                   | 73.2                                  | 0.911   |
| CD19+                     | 71.7                                   | 58.9                                  | 0.149   |
| CD20+                     | 41.1                                   | 43.1                                  | 0.829   |
| CD22+                     | 62.7                                   | 48.1                                  | 0.121   |
| CD13+                     | 33.9                                   | 50.0                                  | 0.073   |
| CD33+                     | 32.3                                   | 57.1                                  | 0.004   |
| CD2+                      | 30.6                                   | 28.3                                  | 0.798   |
| CD3+                      | 12.2                                   | 30.5                                  | 0.023   |
| CD5+                      | 29.8                                   | 40.4                                  | 0.271   |
| CD7+                      | 32.0                                   | 41.1                                  | 0.334   |

(Continued)

| Characteristics                 | <i>MYCBP2</i> high expression ( <i>N</i> = 65) | <i>MYCBP2</i> low expression ( <i>N</i> = 66) | <i>P</i> value |
|---------------------------------|------------------------------------------------|-----------------------------------------------|----------------|
| Extramedullary infiltration (%) |                                                |                                               |                |
| Liver                           | 15.4                                           | 35.7                                          | 0.007          |
| Spleen                          | 35.9                                           | 54.3                                          | 0.033          |
| Lymph node                      | 49.2                                           | 56.5                                          | 0.398          |
| Genetics (%)                    |                                                |                                               |                |
| Complex karyotype               | 14.6                                           | 12.5                                          | 0.765          |
| Complete remission rate (%)     | 92.7                                           | 85.5                                          | 0.213          |

**Supplementary Table S3: The correlation of expression of *c-MYC*<sup>high</sup>*MYCBP2*<sup>low</sup> with clinical features in acute lymphoblastic leukemia**

| Characteristics                 | <i>c-MYC</i> <sup>high</sup> <i>MYCBP2</i> <sup>low</sup><br>( <i>N</i> = 20) | <i>c-MYC</i> <sup>low</sup> <i>MYCBP2</i> <sup>high</sup> ( <i>N</i> = 31) | <i>P</i> value |
|---------------------------------|-------------------------------------------------------------------------------|----------------------------------------------------------------------------|----------------|
| Age (years)                     |                                                                               |                                                                            |                |
| median (range)                  | 40 (14–77)                                                                    | 30 (14–75)                                                                 | 0.344          |
| Sex (%)                         |                                                                               |                                                                            |                |
| male                            | 70.0                                                                          | 64.5                                                                       | 0.685          |
| WBC, × 10 <sup>9</sup> /L       |                                                                               |                                                                            |                |
| median (range)                  | 101.5 (5.3–437.4)                                                             | 29.4 (1.5–183.9)                                                           | 0.007          |
| HGB,g/L                         |                                                                               |                                                                            |                |
| median (range)                  | 76.0 (53.0–143.0)                                                             | 99.0 (42.0–171.0)                                                          | 0.244          |
| PLT, × 10 <sup>9</sup> /L       |                                                                               |                                                                            |                |
| median (range)                  | 16.5 (5.0–74.0)                                                               | 39.0 (2.0–267.0)                                                           | 0.013          |
| LDH (u/L)                       |                                                                               |                                                                            |                |
| median (range)                  | 1635.0 (191.0–8079.0)                                                         | 739.0 (124.0–8601.0)                                                       | 0.076          |
| >1000 (%)                       | 70.0                                                                          | 29.0                                                                       | 0.004          |
| Blasts (%) median (range)       |                                                                               |                                                                            |                |
| bone marrow                     | 93.6 (65.2–98.6)                                                              | 80.2 (27.6–97.2)                                                           | 0.001          |
| peripheral blood                | 83.5 (4.0–99.0)                                                               | 70.5 (0–97.0)                                                              | 0.513          |
| Immune phenotype, %             |                                                                               |                                                                            |                |
| CD34+                           | 90.0                                                                          | 61.3                                                                       | 0.025          |
| HLA-DR+                         | 90.9                                                                          | 69.2                                                                       | 0.229          |
| CD10+                           | 69.2                                                                          | 80.8                                                                       | 0.447          |
| CD19+                           | 53.3                                                                          | 74.1                                                                       | 0.172          |
| CD20+                           | 41.7                                                                          | 37.5                                                                       | 1.000          |
| CD22+                           | 41.7                                                                          | 65.4                                                                       | 0.289          |
| CD13+                           | 65.0                                                                          | 40.0                                                                       | 0.083          |
| CD33+                           | 80.0                                                                          | 25.8                                                                       | 0.000          |
| CD2+                            | 30.8                                                                          | 30.0                                                                       | 1.000          |
| CD3+                            | 47.1                                                                          | 23.8                                                                       | 0.178          |
| CD5+                            | 41.7                                                                          | 35.0                                                                       | 0.724          |
| CD7+                            | 42.9                                                                          | 33.3                                                                       | 0.724          |
| Extramedullary infiltration (%) |                                                                               |                                                                            |                |
| liver                           | 75.0                                                                          | 19.4                                                                       | 0.000          |
| spleen                          | 75.0                                                                          | 33.3                                                                       | 0.004          |
| lymph node                      | 60.0                                                                          | 48.4                                                                       | 0.417          |
| Genetics (%)                    |                                                                               |                                                                            |                |
| Complex karyotype               | 7.1                                                                           | 14.3                                                                       | 0.635          |
| Complete remission rate (%)     | 60.0                                                                          | 92.0                                                                       | 0.027          |

**Supplementary Table S4: The correlation of expression of *Ikaros* with clinical features in acute lymphoblastic leukemia**

| Characteristics                 | <i>Ikaros</i> high expression (N = 79) | <i>Ikaros</i> low expression (N = 53) | P value |
|---------------------------------|----------------------------------------|---------------------------------------|---------|
| Age (years)                     |                                        |                                       |         |
| median (range)                  | 32 (14–75)                             | 36 (14–77)                            |         |
| Sex (%)                         |                                        |                                       |         |
| male                            | 57.0                                   | 64.2                                  | 0.409   |
| WBC, × 10 <sup>9</sup> /L       |                                        |                                       |         |
| median (range)                  | 29.5 (1.0–626.0)                       | 64.9 (1.0–488.0)                      | 0.016   |
| HGB, g/L                        |                                        |                                       |         |
| median (range)                  | 100.0 (34.0–167.0)                     | 95.0 (44.0–171.0)                     | 0.752   |
| PLT, × 10 <sup>9</sup> /L       |                                        |                                       |         |
| median (range)                  | 48.0 (2.0–292.0)                       | 41.0 (2.0–354.0)                      | 0.114   |
| LDH (u/L)                       |                                        |                                       |         |
| median (range)                  | 761.5 (124.0–8702.0)                   | 985.0 (191.0–8079.0)                  | 0.185   |
| Blasts (%) median (range)       |                                        |                                       |         |
| bone marrow                     | 86.2 (27.6–99.5)                       | 88.0 (49.6–99.6)                      | 0.459   |
| peripheral blood                | 61.0 (0.0–10.0)                        | 70.5 (0.0–99.0)                       | 0.141   |
| B or T lineage (%)              |                                        |                                       |         |
| B-ALL                           | 78.5                                   | 60.4                                  |         |
| T-ALL                           | 21.5                                   | 39.6                                  | 0.024   |
| Immune phenotype, %             |                                        |                                       |         |
| CD34+                           | 63.2                                   | 72.0                                  | 0.303   |
| HLA-DR+                         | 82.9                                   | 70.7                                  | 0.134   |
| CD10+                           | 70.4                                   | 80.4                                  | 0.226   |
| CD19+                           | 78.1                                   | 59.1                                  | 0.028   |
| CD20+                           | 44.8                                   | 34.9                                  | 0.303   |
| CD22+                           | 55.6                                   | 46.5                                  | 0.348   |
| CD13+                           | 33.3                                   | 57.1                                  | 0.009   |
| CD33+                           | 40.5                                   | 60.0                                  | 0.033   |
| CD2+                            | 21.5                                   | 25.0                                  | 0.682   |
| CD3+                            | 13.4                                   | 25.6                                  | 0.107   |
| CD5+                            | 23.4                                   | 41.0                                  | 0.059   |
| CD7+                            | 20.9                                   | 50.0                                  | 0.002   |
| Extramedullary infiltration (%) |                                        |                                       |         |
| Liver                           | 11.4                                   | 41.5                                  | 0.000   |
| Spleen                          | 34.6                                   | 56.6                                  | 0.013   |
| lymph node                      | 41.8                                   | 57.7                                  | 0.074   |

(Continued)

| <b>Characteristics</b>      | <b><i>Ikaros</i> high expression (N = 79)</b> | <b><i>Ikaros</i> low expression (N = 53)</b> | <b><i>P</i> value</b> |
|-----------------------------|-----------------------------------------------|----------------------------------------------|-----------------------|
| Genetics (%)                |                                               |                                              |                       |
| Complex karyotype           | 7.4                                           | 17.1                                         | 0.257                 |
| Complete remission rate (%) | 94.3                                          | 79.2                                         | 0.013                 |
